# Supplementary material
Source: publisher site journal article supplement (https://www.degruyterbrill.com/publication/isbn/9783110341973/downloadAsset/9783110341973_List-of-Figures-and-Tables.pdf)

# **Systematisches Fallrepetitorium Verfassungsrecht – Staatsorganisationsrecht, Grundrechte, Europarecht**

Arne-Patrik Heinze

ISBN: 978-3-11-031474-8

© 2014 Walter de Gruyter GmbH, Berlin/Boston

**Abbildungsübersicht / List of Figures**  
**Tabellenübersicht / List of Tables**

**Zur Veranschaulichung:**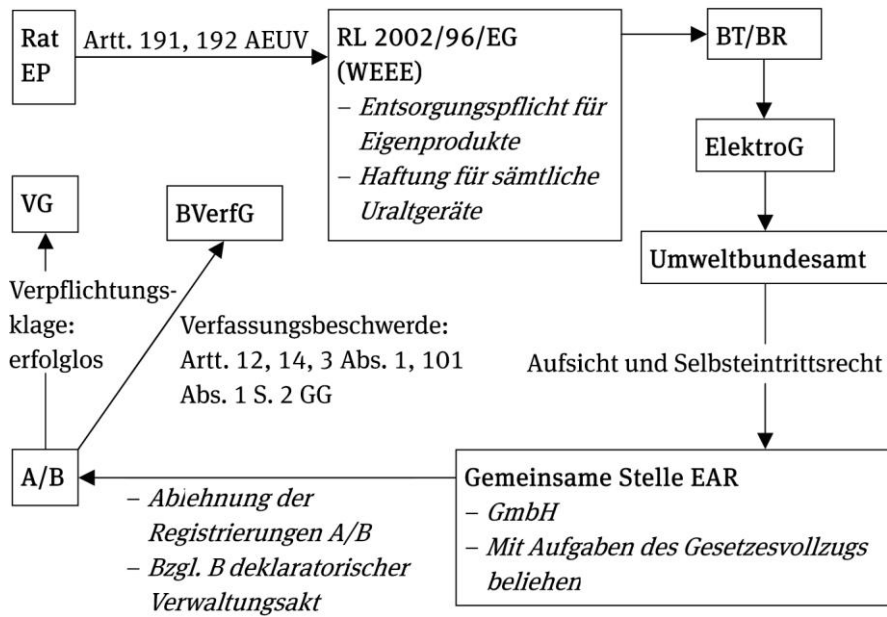

Supplement: Supplementary file 1 [file 9783110341973_List-of-Figures-and-Tables.pdf]
